# Supplementary material for: Control over crystallization of CaCO3micro-particles by a novel CO2SM
Source: Royal Society of Chemistry journal article supplement (doi:10.1039/c5ce01435b), 2015-01-01
Supplement: c5ce01435b1.pdf [file c5ce01435b1.pdf]

## Supporting Information

# Control over Crystallization of CaCO<sub>3</sub> micro- particles by A Novel CO<sub>2</sub>SM

Bo Guo, Tianxiang Zhao, Feng Sha, Fei Zhang, Qiang Li, and Jianbin Zhang\*

College of Chemical Engineering, Inner Mongolia University of Technology, Huhhot 010051, China

\* To whom correspondence should be addressed. Tel.: +86-10-62751529; Fax: +86-10-62751529. E-mail:  
tadzhang@pku.edu.cn

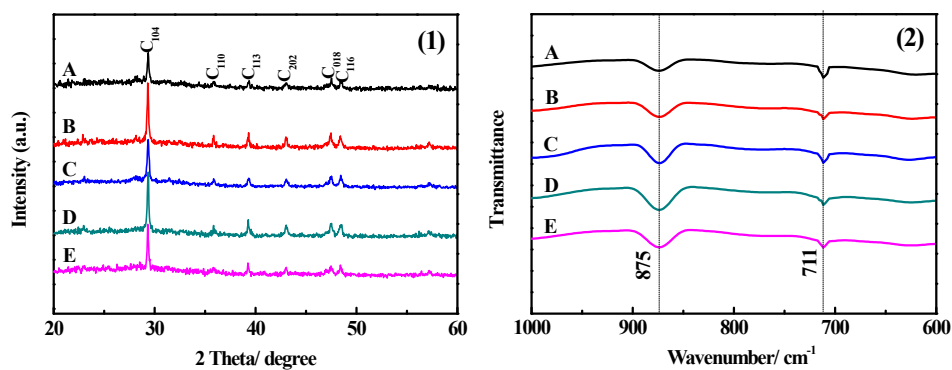

**Fig. S1** XRD patterns (1) and FTIR spectra (2) of as-obtained samples in 0.6 g·L<sup>-1</sup> concentration of CO<sub>2</sub>SM for 1 h at different reaction temperature: (A) 80 °C; (B) 90 °C; (C) 100 °C; (D) 110 °C; and (E) 120 °C.

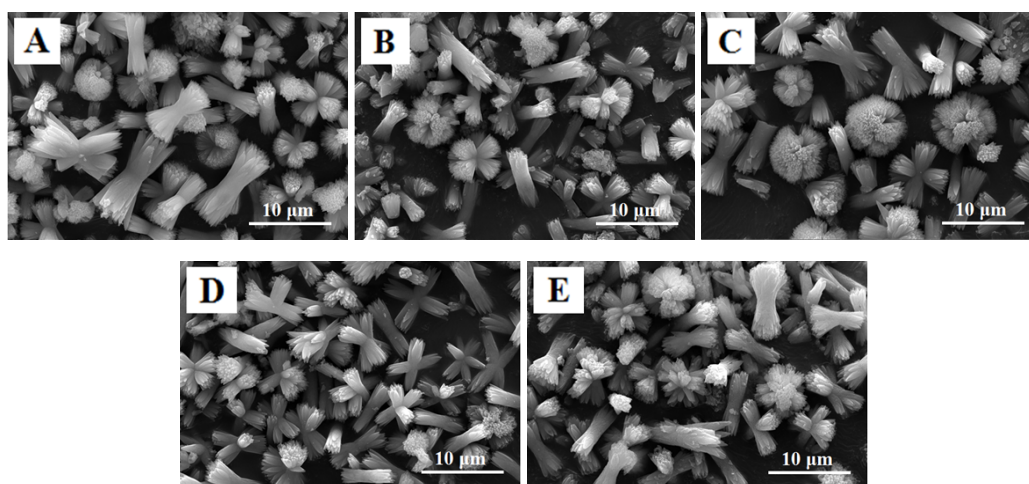

**Fig. S2** SEM images of CaCO<sub>3</sub> micro particles were acquired under different reaction time at 100 °C. When the concentration of CO<sub>2</sub>SM was 0.6 g·L<sup>-1</sup>, the reaction time were: (Sample A: 60 min); (Sample B: 90 min); (Sample C: 120 min); (Sample D: 150 min); and (Sample E: 180 min).

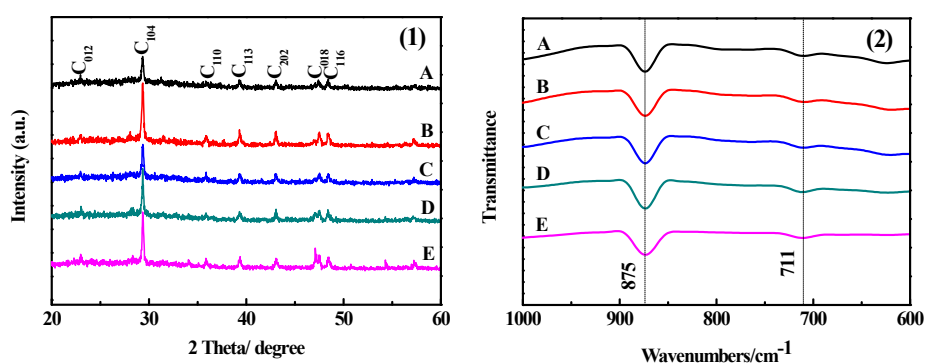

**Fig. S3** XRD patterns (1) and FTIR spectra (2) of as-obtained samples in 0.6 g·L<sup>-1</sup> concentration of CO<sub>2</sub>SM at 100 °C at different reaction time: (A) 60 min; (B) 90 min; (C) 120 min; (D) 150 min; and (E) 180 min.

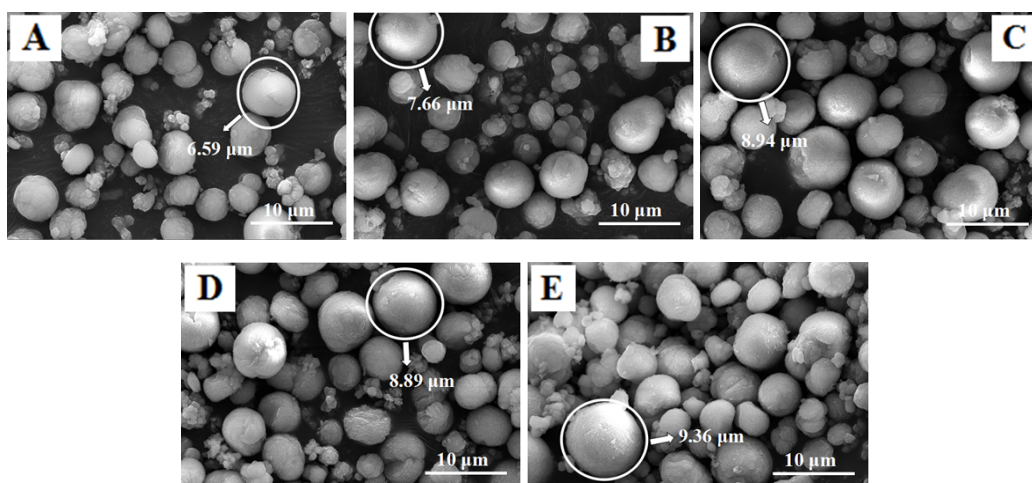

**Fig. S4** SEM images of  $\text{CaCO}_3$  micro particles were acquired under different reaction time at 120 °C. When the concentration of  $\text{CO}_2\text{SM}$  was  $40 \text{ g}\cdot\text{L}^{-1}$ , the reaction time were: (Sample A: 60 min); (Sample B: 90 min); (Sample C: 120 min); (Sample D: 150 min); and (Sample E: 180 min).

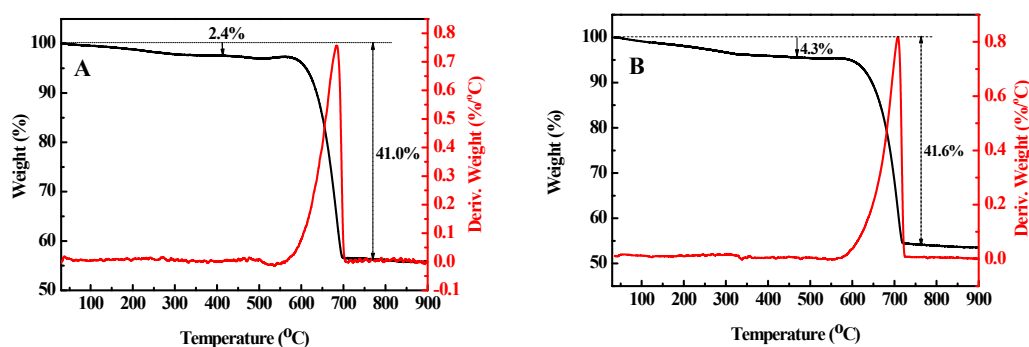

**Fig. S5** Thermogravimetric analysis curves of as-prepared  $\text{CaCO}_3$  samples. A: belt-like shape and B: spherical-like shape.

**Table S1** The  $\text{CaCO}_3$  samples prepared under different the reaction temperature: (Sample A: 80 °C); (Sample B: 90 °C); (Sample C: 100 °C); (Sample D: 110 °C); and (Sample E: 120 °C), when the concentration of  $\text{CO}_2\text{SM}$  was  $0.6 \text{ g}\cdot\text{L}^{-1}$ ,  $t = 1 \text{ h}$ , measured particles size, and average size for each sample.

| Number | Measured particles size ( $\mu\text{m} \times \mu\text{m}$ ) of each sample |           |           |           |           |
|--------|-----------------------------------------------------------------------------|-----------|-----------|-----------|-----------|
|        | A                                                                           | B         | C         | D         | E         |
| 1      | 10.11×2.34                                                                  | 9.31×1.83 | 8.72×1.76 | 8.51×1.71 | 8.29×1.49 |
| 2      | 8.5 ×1.70                                                                   | 7.66×1.70 | 7.66×1.28 | 8.29×1.59 | 6.81×1.49 |
| 3      | 8.29×1.49                                                                   | 6.38×1.49 | 7.23×1.49 | 6.81×1.28 | 8.27×1.28 |
| 4      | 8.51×1.91                                                                   | —         | 7.87×1.71 | 5.74×1.28 | 6.76×1.06 |

|         |           |           |           |           |           |
|---------|-----------|-----------|-----------|-----------|-----------|
| 5       | 6.17×1.28 | —         | 8.72×1.49 | —         | 6.17×1.06 |
| 6       | 8.72×1.91 | —         | 5.53×1.28 | —         | —         |
| 7       | —         | —         | 7.87×1.49 | —         | —         |
| 8       | —         | —         | 6.81×1.28 | —         | —         |
| 9       | —         | —         | 6.17×1.17 | —         | —         |
| Average | 8.39×1.77 | 7.78×1.67 | 7.39×1.44 | 7.33×1.46 | 7.26×1.27 |

**Table S2** The CaCO<sub>3</sub> samples prepared under different the reaction temperature: (Sample A: 80 °C); (Sample B: 90 °C); (Sample C: 100 °C); (Sample D: 110 °C); and (Sample E: 120 °C), when the concentration of CO<sub>2</sub>SM was 40 g·L<sup>-1</sup>, *t* = 2 h, measured particles size, and average size for each sample.

| Number | Measured particles size (µm ) of each sample |      |      |      |      |
|--------|----------------------------------------------|------|------|------|------|
|        | A                                            | B    | C    | D    | E    |
| 1      | 4.68                                         | 7.23 | 8.09 | 4.89 | 4.26 |
| 2      | 5.11                                         | 5.53 | 7.02 | 4.26 | 2.96 |
| 3      | 5.32                                         | 5.74 | 4.26 | 3.83 | 3.71 |
| 4      | 4.89                                         | 5.53 | 5.74 | 3.41 | 3.71 |
| 5      | 5.74                                         | 6.17 | 4.89 | 3.83 | 2.96 |
| 6      | 4.89                                         | 5.79 | 5.32 | 3.62 | 2.59 |
| 7      | 5.53                                         | 5.26 | 5.11 | 4.26 | 3.33 |
| 8      | 3.95                                         | 3.95 | 6.17 | 2.55 | 3.69 |
| 9      | 4.74                                         | 5.78 | 2.34 | 4.26 | 4.04 |
| 10     | 4.47                                         | 4.74 | 5.96 | 4.26 | 4.07 |
| 11     | 4.89                                         | 6.84 | —    | —    | 3.33 |
| 12     | 5.01                                         | —    | —    | —    | 2.96 |
| 13     | —                                            | —    | —    | —    | 3.69 |
| 14     | —                                            | —    | —    | —    | 2.96 |
| 15     | —                                            | —    | —    | —    | 3.33 |
| 16     | —                                            | —    | —    | —    | 3.42 |
| 17     | —                                            | —    | —    | —    | 3.16 |
| 18     | —                                            | —    | —    | —    | 3.42 |

|         |      |      |      |      |      |
|---------|------|------|------|------|------|
| 19      | —    | —    | —    | —    | 3.42 |
| 20      | —    | —    | —    | —    | 3.03 |
| 21      | —    | —    | —    | —    | 2.89 |
| 22      | —    | —    | —    | —    | 3.16 |
| 23      | —    | —    | —    | —    | 4.21 |
| 24      | —    | —    | —    | —    | 4.09 |
| Average | 4.94 | 5.69 | 5.49 | 3.92 | 3.43 |

**Table S3** The CaCO<sub>3</sub> samples prepared under different reaction time at 120 °C. The reaction time were: (Sample A: 60 min); (Sample B: 90 min); (Sample C: 120 min); (Sample D: 150 min); and (Sample E: 180 min), when the concentration of CO<sub>2</sub>SM was 40 g·L<sup>-1</sup>, measured particles size, and average size for each sample.

| Number  | Measured particles size (µm ) of each sample |      |      |      |      |
|---------|----------------------------------------------|------|------|------|------|
|         | A                                            | B    | C    | D    | E    |
| 1       | 6.59                                         | 7.66 | 8.94 | 8.89 | 9.36 |
| 2       | 4.04                                         | 5.71 | 6.57 | 7.14 | 7.35 |
| 3       | 5.53                                         | 5.99 | 4.86 | 6.83 | 6.87 |
| 4       | 4.26                                         | 6.14 | 7.71 | 7.16 | 5.86 |
| 5       | 5.53                                         | 6.03 | 6.61 | 5.74 | 6.12 |
| 6       | 3.95                                         | 3.68 | 7.14 | 6.58 | —    |
| 7       | 5.01                                         | 4.47 | 7.09 | —    | —    |
| 8       | 3.68                                         | 4.74 | 5.79 | —    | —    |
| 9       | —                                            | 4.21 | 5.66 | —    | —    |
| 10      | —                                            | —    | 5.26 | —    | —    |
| 11      | —                                            | —    | 4.74 | —    | —    |
| 12      | —                                            | —    | 4.72 | —    | —    |
| Average | 4.82                                         | 5.41 | 6.26 | 7.06 | 7.12 |
